# Supplementary material for: Bipolar Disorder Associated microRNA, miR-1908-5p, Regulates the Expression of Genes Functioning in Neuronal Glutamatergic Synapses
Source: PubMed Central journal article supplement — Exp Neurobiol. 2016 Oct 28;25(6):296–306. doi: 10.5607/en.2016.25.6.296 (PMC5195815; doi:10.5607/en.2016.25.6.296), 2016-10-28
Supplement: en-25-296-s007.pdf [file en-25-296-s007.pdf]

## **Bipolar disorder associated microRNA, miR-1908-5p, regulates the expression of genes functioning in neuronal glutamatergic synapses**

Yoonhee Kim, Yinhua Zhang, Kaifang Pang, Hyojin Kang, Heejoo Park, Yeunkum Lee, Bokyoung Lee, Heon-Jeong Lee, Won-Ki Kim, Dongho Geum and Kihoon Han

**Supplementary Figure 1** Conservation of the miR-1908-3p and miR-1908-5p sequences among 100 animal genomes

**Supplementary Figure 2** Conservation of the miR-34a-3p and miR-34a-5p sequences among 100 animal genomes

**Supplementary Figure 3** The thresholds of context++ scores for miR-1908-3p and miR-1908-5p putative target genes predicted by TargetScan

**Supplementary Figure 4** GO analysis of miR-1908-3p and miR-1908-5p target genes

**Supplementary Figure 5** Conservation of the first (770-776) and second (803-809) miR-1908-5p binding sites in the *GRM4* 3'UTR among 100 animal genomes

**Supplementary Figure 6** Human brain expression of *STX1A* and *CLSTN1*, and their Spearman's correlations with miR-1908-5p

**Supplementary Table 1** Summary of statistical analyses for the experiments

**Supplementary Table 1** Summary of statistical analyses for the experiments.

| Assay/Measurement                                      | Values (mean±SEM, n)                                                                                                                                                                                                                                                                                                                                                                                                                                                                                                                     | Statistical test and P values                                       | Figure    |
|--------------------------------------------------------|------------------------------------------------------------------------------------------------------------------------------------------------------------------------------------------------------------------------------------------------------------------------------------------------------------------------------------------------------------------------------------------------------------------------------------------------------------------------------------------------------------------------------------------|---------------------------------------------------------------------|-----------|
| Luciferase assay for miR-1908-5p synaptic target genes | <i>DLGAP4</i> , control miR (1±0.03, 6)<br><i>DLGAP4</i> , miR-1908-5p (0.76±0.03, 6)<br><i>GRIN1</i> , control miR (1±0.04, 6)<br><i>GRIN1</i> , miR-1908-5p (0.63±0.02, 6)<br><i>STX1A</i> , control miR (1±0.04, 6)<br><i>STX1A</i> , miR-1908-5p (0.78±0.04, 6)<br><i>CLSTN1</i> , control miR (1±0.05, 6)<br><i>CLSTN1</i> , miR-1908-5p (0.73±0.04, 6)<br><i>GRASP</i> , control miR (1±0.04, 6)<br><i>GRASP</i> , miR-1908-5p (1.14±0.06, 6)<br><i>GRM4</i> , control miR (1±0.03, 6)<br><i>GRM4</i> , miR-1908-5p (0.62±0.03, 6) | Unpaired two-tailed Student's t-test, **P<0.01, ***P<0.001          | Figure 1d |
| Luciferase assay for <i>GRM4</i> binding sites         | <i>GRM4</i> WT, control miR (1±0.04, 6)<br><i>GRM4</i> WT, miR-1908-5p (0.76±0.04, 6)<br><i>GRM4</i> M1, control miR (1±0.02, 6)<br><i>GRM4</i> M1, miR-1908-5p (0.82±0.03, 6)<br><i>GRM4</i> M2, control miR (1±0.03, 6)<br><i>GRM4</i> M2, miR-1908-5p (0.88±0.04, 6)<br><i>GRM4</i> M1/2, control miR (1±0.06, 6)<br><i>GRM4</i> M1/2, miR-1908-5p (0.93±0.09, 6)                                                                                                                                                                     | Unpaired two-tailed Student's t-test, *P<0.05, **P<0.01, ***P<0.001 | Figure 1e |
| qRT-PCR for miR-1908-5p in human NPCs                  | Control, vehicle (1±0.00, 3)<br>Control, lithium (1.21±0.09, 3)<br>Control, valproate (1.68±0.08, 3)<br>BD, vehicle (1±0.00, 3)<br>BD, lithium (1.00±0.15, 3)<br>BD, valproate (0.43±0.09, 3)                                                                                                                                                                                                                                                                                                                                            | Unpaired two-tailed Student's t-test, *P<0.05                       | Figure 3b |
